# Supplementary material for: Effect of surface modification on interfacial nanobubble morphology and contact line tension
Source: Royal Society of Chemistry journal article supplement (doi:10.1039/c5sm00583c), 2015-01-01
Supplement: c5sm00583c1.pdf [file c5sm00583c1.pdf]

## **Supporting Information**

### **Effect of Surface Modification on Interfacial Nanobubble Morphology and Contact Line Tension**

Kaushik K. Rangharajan, Kwang J. Kwak, A.T. Conlisk, Yan Wu\* & Shaurya Prakash\*

#### **Corresponding authors**

\*Shaurya Prakash; **E-mail:** prakash.31@osu.edu, \*Yan Wu; **E-mail:** wuy@uwplatt.edu

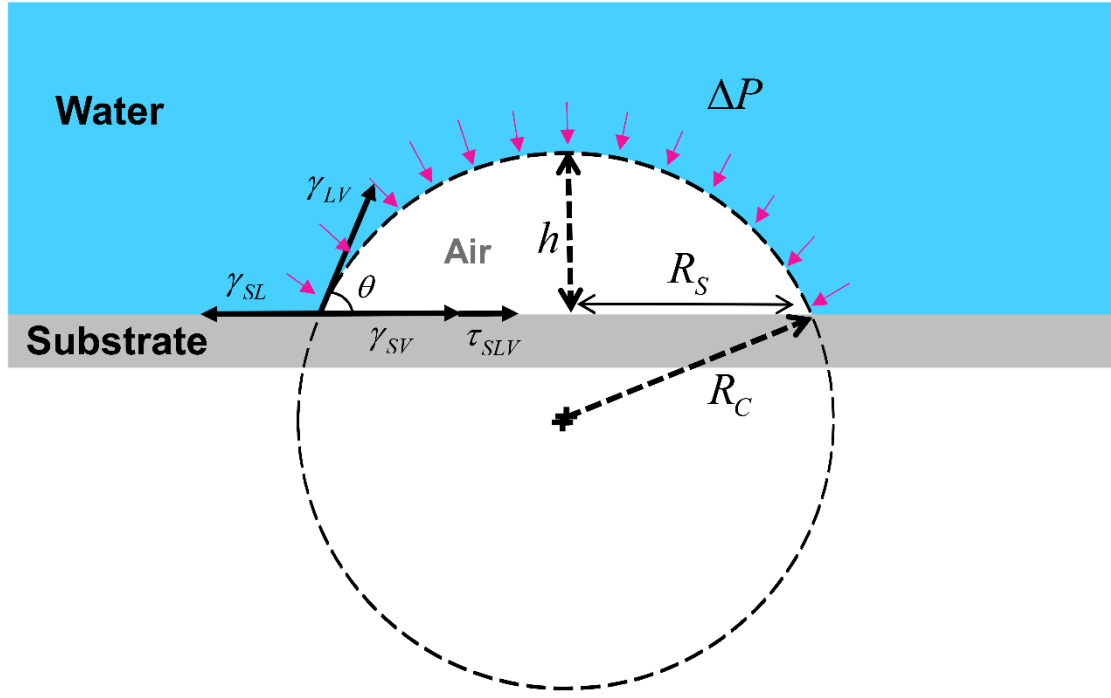

Figure S1. Free body diagram of a nanobubble pinned to a substrate surrounded by water, where  $h$  is the nanobubble height,  $R_s$  is the nanobubble lateral radius,  $R_c$  is the radius of curvature,  $\Delta P$  is the Laplace pressure, and  $\tau_{SLV}$  is three phase contact line tension.  $\gamma_{LV}$ ,  $\gamma_{SL}$ ,  $\gamma_{SV}$  are the liquid-vapor, solid-liquid, and solid-vapor surface tensions respectively. The geometric dimensions used in this figure arise from tip-corrected AFM measurements as described in the main manuscript.

### Vertical force balance to estimate Laplace pressure

$$(\gamma_{LV} \sin\theta) 2\pi R_s - \Delta P \pi R_s^2 = 0$$

$$\Delta P = \frac{2\gamma_{LV} \sin\theta}{R_s}$$

$$\frac{R_s}{\sin\theta} = R_c$$

$$\Delta P = \frac{2\gamma_{LV}}{R_c} \text{ (Laplace pressure)}$$

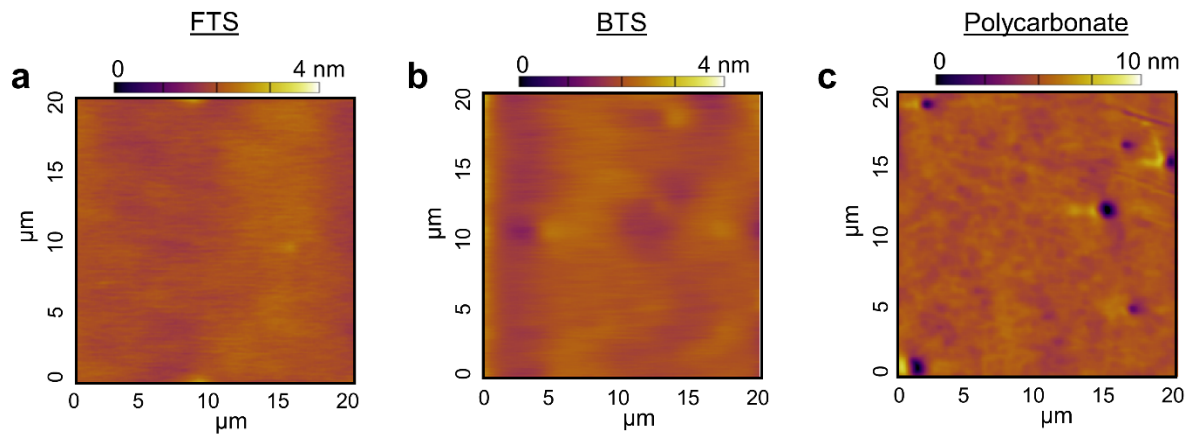

Figure S2. TM-AFM scans in air showing roughness plot for a) FTS b) BTS and c) Polycarbonate over a scan area of 20 μm x 20 μm. The RMS roughness values are described in Table 1 in the main manuscript.

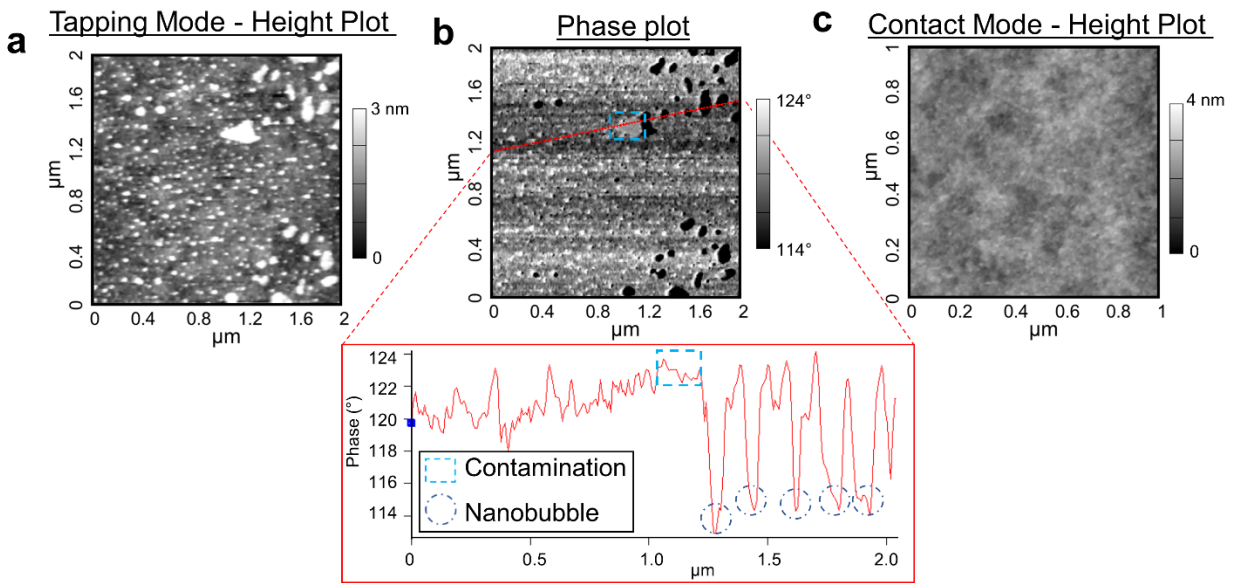

Figure S3: Figure S3.a) 2  $\mu\text{m}$  x 2  $\mu\text{m}$  tapping mode scan of polycarbonate immersed in air-equilibrated water. b) Corresponding phase plot that shows a phase shift of  $\sim 8^\circ$  over nanobubbles, which is significantly higher in comparison to the phase shift over the contamination ( $\sim 0.5^\circ$  phase shift). The phase plot also clearly shows that the scanning was done in the attractive regime as phase  $> 90^\circ$  c) Hard contact mode scan of polycarbonate substrate in air-equilibrated water does not show any nanobubbles.

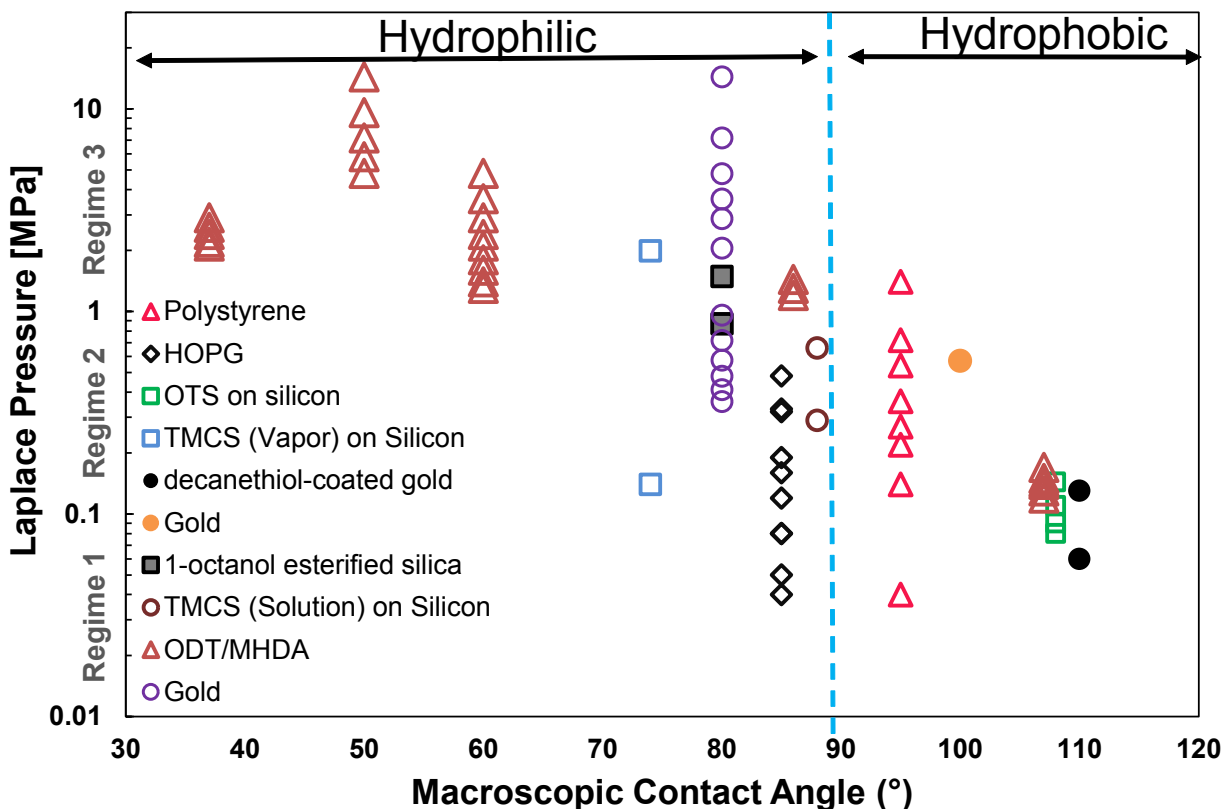

Figure S4. Regime map summarizing Laplace pressure variation of surface nanobubbles as a function of macroscopic contact angle. Except for HOPG ( $\diamond$ ), where most nanobubbles were introduced via solvent exchange, all hydrophilic substrates sustain nanobubbles of Laplace pressure that is higher than atmospheric pressure by an order of magnitude (regime 3). Polystyrene ( $\Delta$ )(Contact angle  $94^\circ - 96^\circ$ ) has nanobubbles spread across regime 2 and as the surfaces become progressively hydrophobic, the Laplace pressure distribution is primarily limited to regime 1 and lower levels of regime 2. Nanobubbles formed on hydrophilic gold ( $\circ$ ) belong to regime 3 when imaged in air-equilibrated water and drop down to regime 2 when imaged in 25% ethanol-water mixture. Importantly, the range of observed Laplace pressures for similar conditions, including similar surface chemistry, points to the fact that nanobubble size and stability hypotheses cannot yet be generalized. Figure S2 shows a broad summary of Laplace pressures indicating sizes of nanobubbles for a variety of reported substrates. It is worth noting that even for similar substrates, no consensus exists on size and therefore subsequent Laplace pressure for the nanobubble observations suggesting that a variety of experimental conditions affect formation, size, and eventual stability of nanobubbles.

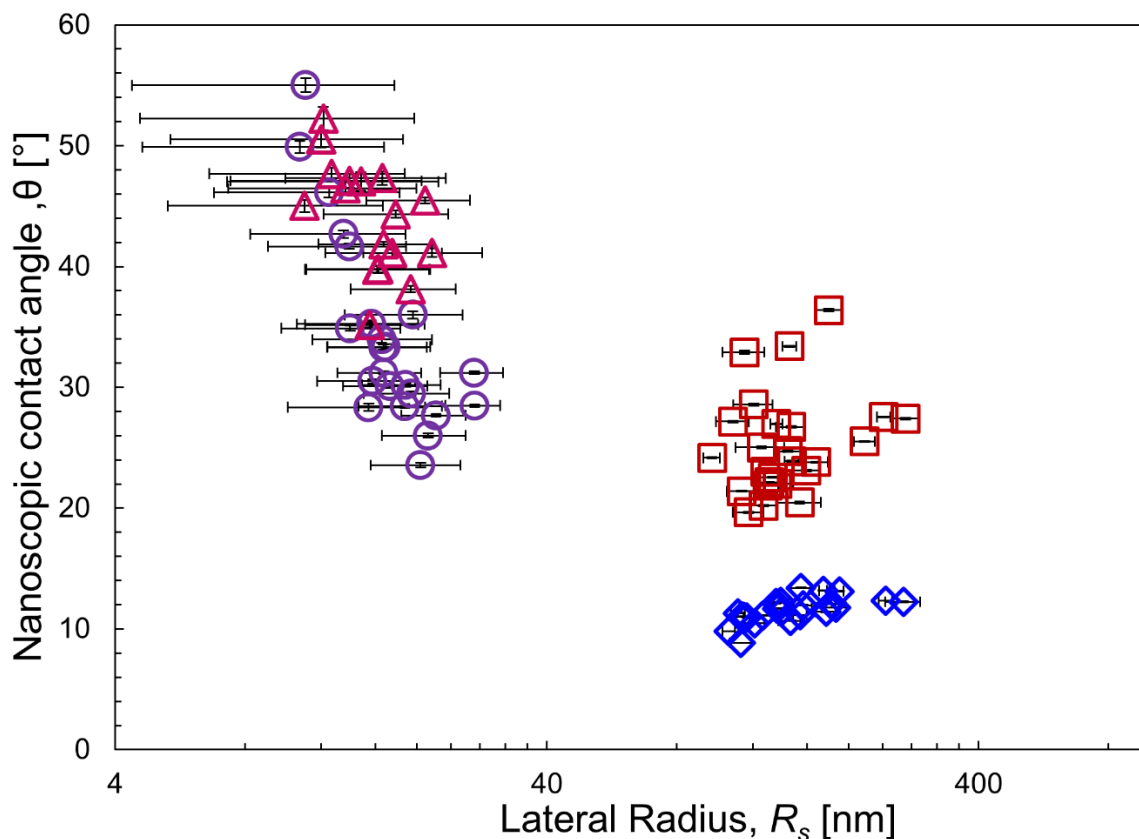

Figure S5. Plot of nanoscopic contact angle,  $\theta$  compared with lateral radius,  $R_s$  for nanobubbles formed on fluoro-terminated silica (FTS,  $\square$ ), bromo-terminated silica (BTS,  $\circ$ ), polycarbonate imaged with air-equilibrated water ( $\Delta$ ) and polycarbonate imaged after ethanol exchange method ( $\diamond$ ). The nanoscopic contact angle varies as  $25.2^\circ \pm 4.2^\circ$  for FTS,  $34.2^\circ \pm 7.9^\circ$  for BTS,  $44.1^\circ \pm 4.5^\circ$  for polycarbonate imaged with air-equilibrated water and  $11.5^\circ \pm 1.0^\circ$  for polycarbonate imaged after ethanol exchange method. Also, nanobubbles with  $R_s < 50$  nm on an average have a higher  $\theta$  compared to those with  $R_s > 50$  nm. Moreover, the nanoscopic contact angle for all the bubbles is significantly smaller compared to the macroscopic contact angle of a substrate measured via sessile drop method. Previous study by Borkent et al.<sup>†</sup> also provides a literature summary of the value of  $\theta$  over several substrates such as HOPG, Si – OTS, Polystyrene, Gold etc. but not the substrates analyzed in the present study. Also, the effect of ethanol exchange on changes to nanobubble morphology is not taken into account. In the present study, it is observed that the lateral radius of polycarbonate increases by an order of magnitude after ethanol exchange and the nanoscopic contact angle decreases by  $32.6^\circ$ . Error bars indicate one standard deviation of representative parameters.

<sup>†</sup> B.M. Borkent, S. de Beer, F. Mugele, D. Lohse, *Langmuir* 2009, **26**(1):260-268

Table S1. Reference information for various data points used in plotting the regime map.

| <u>Substrate (contact angle °)</u>    | <u>Laplace Pressure [MPa]</u>     | <u>Supersaturated</u> | <u>Reference</u> |
|---------------------------------------|-----------------------------------|-----------------------|------------------|
| <b><u>Regime 1</u></b>                |                                   |                       |                  |
| Polystyrene on Silicon (94 - 96)      | 0.04                              | No                    | S1               |
| HOPG (NA)                             | 0.05                              | Solvent exchange      | S2               |
| HOPG (NA)                             | 0.04                              | Solvent exchange      | S2               |
| OTS silicon (108)                     | 0.08                              | Solvent exchange      | S3               |
| HOPG (NA)                             | 0.08                              | Solvent exchange      | S4               |
| decanethiol-coated gold(Adv 110°)     | 0.06                              | Solvent exchange      | S5               |
| OTS on silicon (Adv 112°)             | 0.09                              | Solvent exchange      | S6               |
| <b><u>Regime 2</u></b>                |                                   |                       |                  |
| OTS on silicon (Adv 112°)             | 0.14                              | Solvent exchange      | S6               |
| Polystyrene on Silicon (94 - 96)      | 0.14                              | No                    | S1               |
| TMCS Vapor on Silicon (Adv 74°)       | 0.14                              | Using CO <sub>2</sub> | S7               |
| TMCS Solution on Silicon (Adv 88°)    | 0.29                              | Using CO <sub>2</sub> | S1               |
| TMCS Solution on Silicon (Adv 88°)    | 0.66                              | Using CO <sub>2</sub> | S1               |
| 1-octanol esterified silica (Adv 80°) | 0.87                              | Solvent exchange      | S8               |
| HOPG (NA)                             | 0.16                              | Solvent exchange      | S9               |
| Gold (100°)                           | 0.57                              | No                    | S10              |
| Polystyrene (97)                      | 0.27                              | No                    | S11              |
| Polystyrene (NA)                      | 0.72                              | No                    | S12              |
| Polystyrene (NA)                      | 0.22                              | No                    | S12              |
| HOPG (NA)                             | 0.32                              | Solvent exchange      | S13              |
| HOPG (NA)                             | 0.12                              | Solvent exchange      | S13              |
| HOPG (NA)                             | 0.33                              | No                    | S14              |
| HOPG (NA)                             | 0.19                              | Solvent exchange      | S15              |
| decanethiol-coated gold (Adv 110°)    | 0.13                              | Solvent exchange      | S5               |
| OTS on silicon (110°)                 | 0.11                              | No                    | S16              |
| ODT/MHDA (107°)                       | 0.17,0.15,0.144<br>0.14,0.13,0.12 | No                    | S17              |
| Polystyrene on Silicon (95 °)         | 0.54                              | No                    | S18              |

|                                      |                                         |                       |     |
|--------------------------------------|-----------------------------------------|-----------------------|-----|
| Polystyrene on Silicon (95 °)        | 0.36                                    | No                    | S18 |
| Gold (80°)                           | 0.96,0.72,0.58,<br>0.48,0.41,0.36       | Solvent exchange      | S19 |
| <b><u>Regime 3</u></b>               |                                         |                       |     |
| 1-octanol esterified silica (80 Adv) | 1.49                                    | Solvent exchange      | S8  |
| Polystyrene - film (95)              | 1.4                                     | No                    | S20 |
| TMCS Vapor on Silicon (Adv 74°)      | 1.99                                    | Using CO <sub>2</sub> | S1  |
| ODT/MHDA (86°)                       | 1.2,1.31,1.44                           | No                    | S17 |
| ODT/MHDA (60°)                       | 4.8,3.6,2.9,2.4,2.1,<br>1.8,1.6,1.4,1.3 | No                    | S17 |
| ODT/MHDA (50°)                       | 14.4, 9.6, 7.2, 5.8,<br>4.8             | No                    | S17 |
| ODT/MHDA (37°)                       | 2.9, 2.6, 2.4, 2.2,<br>2.1              | No                    | S17 |
| Gold (80°)                           | 14.4,7.2,4.8,<br>3.6,2.9,2.1            | No                    | S19 |

### **Abbreviations**

HOPG, Highly ordered pyrolytic graphite; ODT, octadecanethiol; OTS, Octadecyltrichlorosilane; MHDA, 16-mercaptohexadecanoic acid; TMCS, Trimethylchlorosilane;

### **References**

- S1. D. Li, D. Jing, Y. Pan, W. Wang and X. Zhao, *Langmuir*, 2014, **30**, 6079-6088.
- S2. X. H. Zhang, X. Zhang, J. Sun, Z. Zhang, G. Li, H. Fang, X. Xiao, X. Zeng and J. Hu, *Langmuir*, 2006, **23**, 1778-1783.
- S3. X. H. Zhang, N. Maeda and V. S. J. Craig, *Langmuir*, 2006, **22**, 5025-5035.
- S4. M. A. Hampton and A. V. Nguyen, *Minerals Engineering*, 2009, **22**, 786-792.
- S5. X. Zhang, D. Y. C. Chan, D. Wang and N. Maeda, *Langmuir*, 2013, **29**, 1017-1023.
- S6. X. H. Zhang, A. Quinn and W. A. Ducker, *Langmuir*, 2008, **24**, 4756-4764.
- S7. J. Yang, J. Duan, D. Fornasiero and J. Ralston, *The Journal of Physical Chemistry B*, 2003, **107**, 6139-6147.
- S8. M. A. Hampton and A. V. Nguyen, *Advances in Colloid and Interface Science*, 2010, **154**, 30-55.



- S9. Y. Chih-Wen, L. Yi-Hsien and H. Ing-Shouh, *Journal of Physics: Condensed Matter*, 2013, **25**, 184010.
- S10. M. Holmberg, A. Kühle, K. A. Mørch and A. Boisen, *Langmuir*, 2003, **19**, 10510-10513.
- S11. A. Agrawal, J. Park, D. Y. Ryu, P. T. Hammond, T. P. Russell and G. H. McKinley, *Nano Letters*, 2005, **5**, 1751-1756.
- S12. A. C. Simonsen, P. L. Hansen and B. Klösgen, *Journal of Colloid and Interface Science*, 2004, **273**, 291-299.
- S13. B. Zhao, Y. Song, S. Wang, B. Dai, L. Zhang, Y. Dong, J. Lu and J. Hu, *Soft Matter*, 2013, **9**, 8837-8843.
- S14. R. P. Berkelaar, H. J. W. Zandvliet and D. Lohse, *Langmuir*, 2013, **29**, 11337-11343.
- S15. W. Shuo, L. Minghuan and D. Yaming, *Journal of Physics: Condensed Matter*, 2013, **25**, 184007.
- S16. N. Ishida, T. Inoue, M. Miyahara and K. Higashitani, *Langmuir*, 2000, **16**, 6377-6380.
- S17. B. Song, W. Walczyk and H. Schönherr, *Langmuir*, 2011, **27**, 8223-8232.
- S18. B. Bhushan, Y. Wang, A. Maali, *Journal of Physics: Condensed Matter*, 2008, **20**, 485004.
- S19. N. Kameda and S. Nakabayashi, *Chemical Physics Letters*, 2008, **461**, 122-126.
- S20. Y. Wang, B. Bhushan and X. Zhao, *Langmuir*, 2009, **25**, 9328-9336.
